# Supplementary material for: Long-Lasting Insecticide Net Ownership, Access and Use in Southwest Ethiopia: A Community-Based Cross-Sectional Study
Source: PubMed Central journal article supplement (PMC5707951; doi:10.3390/ijerph14111312), 2017-10-27
Supplement: ijerph-14-01312-s001.pdf [file ijerph-14-01312-s001.pdf]

**Table S1.** Demographics, household characteristics and history of malaria by quadrants in the study area, southwest Ethiopia.

| Covariates                                                  |                     | Quadrants  |            |            |            |            |
|-------------------------------------------------------------|---------------------|------------|------------|------------|------------|------------|
|                                                             |                     | Q1         | Q2         | Q3         | Q4         | Total      |
|                                                             |                     | n (%)      | n (%)      | n (%)      | n (%)      | n (%)      |
| Gender of HH head                                           | Female              | 22 (11.0)  | 36 (12.2)  | 31 (15.9)  | 14 (13.7)  | 103 (13.1) |
|                                                             | Male                | 182 (89.0) | 270 (87.8) | 173 (84.1) | 88 (86.3)  | 713 (86.9) |
| Age of the HH head (years)                                  | <= 35               | 62 (30.4)  | 107 (34.3) | 70 (32.9)  | 29 (29.0)  | 268 (32.4) |
|                                                             | 36-40               | 35 (17.3)  | 53 (17.3)  | 42 (20.5)  | 17 (16.5)  | 147 (18.1) |
|                                                             | 41-50               | 54 (25.6)  | 76 (25.0)  | 47 (23.3)  | 28 (26.7)  | 205 (24.9) |
|                                                             | >51                 | 53 (26.7)  | 70 (23.4)  | 45 (23.3)  | 28 (27.8)  | 196 (24.6) |
| Education of HH                                             | Above primary       | 38 (16.5)  | 28 (10.2)  | 16 (8.5)   | 17 (17.9)  | 99 (12.1)  |
|                                                             | Primary             | 50 (25.6)  | 25 (8.4)   | 55 (26.6)  | 12 (10.7)  | 142 (17.6) |
|                                                             | No education        | 116 (57.9) | 253 (81.4) | 133 (64.9) | 73 (71.4)  | 575 (70.3) |
| Occupation of HH head                                       | Farmer              | 191 (93.6) | 299 (97.5) | 200(98.0)  | 99 (96.9)  | 789 (96.6) |
|                                                             | Government employee | 10 (4.7)   | 4 (1.5)    | 2 (0.8)    | 1 (0.8)    | 17 (2.0)   |
|                                                             | Other               | 3 (1.7)    | 3 (1.0)    | 2 (1.2)    | 2 (2.3)    | 10 (1.4)   |
| Marital status of HH head                                   | Married             | 178 (86.8) | 277 (90.0) | 181 (88.2) | 93 (91.4)  | 729 (89.0) |
|                                                             | Widowed             | 12 (6.3)   | 20 (6.7)   | 15 (7.8)   | 7 (6.7)    | 54 (6.9)   |
|                                                             | Single/divorced     | 14 (6.9)   | 9 (3.3)    | 8 (4.0)    | 2 (1.9)    | 33 (4.1)   |
| History of malaria in the past year of HH head              | No                  | 154 (75.9) | 270 (87.7) | 165 (81.0) | 75 (75.2)  | 664 (81.7) |
|                                                             | Yes                 | 50 (24.1)  | 36 (12.3)  | 39 (19.0)  | 27 (24.8)  | 152 (18.3) |
| Family size                                                 | 1-3 persons         | 34 (16.8)  | 53 (17.3)  | 37 (17.9)  | 14 (13.7)  | 138 (17.0) |
|                                                             | 4-6 persons         | 118 (59.3) | 165 (53.9) | 114 (55.2) | 54 (52.9)  | 451 (55.4) |
|                                                             | >=7 persons         | 52 (23.9)  | 88 (28.8)  | 53 (26.9)  | 34 (33.4)  | 227 (27.6) |
| Predominant material in HH walls                            | Mud                 | 200 (98.2) | 306 (100)  | 199 (96.9) | 100 (98.0) | 805 (98.5) |
|                                                             | Cements             | 4 (1.8)    | -          | 5 (3.1)    | 2 (2.0)    | 11 (1.5)   |
| Predominant material in HH roof                             | Iron                | 101 (51.3) | 94 (31.8)  | 52 (26.2)  | 34 (31.9)  | 281 (34.8) |
|                                                             | Thatched            | 103 (48.7) | 212 (68.2) | 152 (73.8) | 68 (68.1)  | 535 (65.2) |
| Firewood use for cooking                                    | No                  | 123 (58.9) | 151 (49.1) | 102 (50.9) | 60 (60.7)  | 436 (53.2) |
|                                                             | Yes                 | 81 (41.1)  | 155 (50.9) | 102 (49.1) | 42 (39.3)  | 380 (46.8) |
| Livestock ownership                                         | No                  | 15 (7.9)   | 6 (1.9)    | 12 (6.3)   | 7 (7.0)    | 40 (5.1)   |
|                                                             | Yes                 | 189 (92.1) | 300 (98.1) | 192 (93.7) | 95 (93.0)  | 776 (94.9) |
| History of malaria in the past year of any household member | No                  | 164 (82.1) | 277 (90.3) | 165 (81.4) | 87 (85.9)  | 693 (85.4) |
|                                                             | Yes                 | 40 (17.9)  | 29 (9.7)   | 39 (18.6)  | 15 (14.1)  | 123 (14.6) |
| Discussion about malaria in the past month                  | No                  | 40 (20.8)  | 69 (22.3)  | 50 (26.1)  | 24 (25.8)  | 183 (23.4) |
|                                                             | Yes                 | 164 (79.2) | 237 (77.7) | 154 (73.9) | 78 (74.2)  | 633 (76.6) |

**Table S2.** The surveyed population and LLIN ownership, access and use indicators in study villages, Southwest Ethiopia.

| Quadrants  | Village | People surveyed (n) | I1   | I2   | I3   | I4   | I5   | I6   |
|------------|---------|---------------------|------|------|------|------|------|------|
| Quadrant 1 | 1       | 306                 | 56.9 | 41.2 | 46.7 | 72.4 | 38.2 | 93.8 |
|            | 2       | 270                 | 90.2 | 78.4 | 82.4 | 86.9 | 74.4 | 97.3 |
|            | 3       | 231                 | 86.3 | 74.5 | 80.9 | 86.4 | 67.1 | 80.0 |
|            | 4       | 263                 | 92.2 | 82.4 | 86.7 | 89.4 | 76.0 | 90.9 |
| Quadrant 2 | 5       | 257                 | 96.1 | 88.2 | 91.5 | 91.8 | 85.2 | 94.0 |

|                   |    |     |      |      |      |      |      |      |
|-------------------|----|-----|------|------|------|------|------|------|
|                   | 6  | 264 | 82.4 | 64.7 | 73.4 | 78.6 | 63.6 | 93.4 |
|                   | 7  | 273 | 74.5 | 60.8 | 67.4 | 81.6 | 57.5 | 87.8 |
|                   | 8  | 268 | 86.3 | 64.7 | 75.2 | 75.0 | 63.8 | 93.8 |
|                   | 9  | 267 | 96.1 | 80.4 | 89.9 | 83.7 | 78.2 | 85.5 |
|                   | 10 | 285 | 92.2 | 66.7 | 79.4 | 72.3 | 63.2 | 85.4 |
| <b>Quadrant 3</b> | 11 | 258 | 88.2 | 78.4 | 82.2 | 88.9 | 74.8 | 90.9 |
|                   | 12 | 288 | 90.2 | 70.6 | 80.9 | 78.3 | 72.6 | 94.0 |
|                   | 13 | 277 | 64.7 | 54.9 | 58.8 | 84.8 | 44.0 | 91.6 |
|                   | 14 | 235 | 86.3 | 76.5 | 81.2 | 88.6 | 70.2 | 87.6 |
| <b>Quadrant 4</b> | 15 | 286 | 70.5 | 64.7 | 66.5 | 91.7 | 53.5 | 80.6 |
|                   | 16 | 295 | 74.5 | 56.9 | 61.9 | 76.3 | 47.1 | 87.5 |

I: Calculated indicators of LLIN Coverage, Access and Use; n: number of Ind.
